# Supplementary material for: Changes in Renal Resistive Index Values in Healthy Puppies during the First Months of Life
Source: MDPI journal article supplement (doi:10.3390/ani10081338), 2020-08-03
Supplement: s1 [file s1]

| Age | Dogs | Kidney | Artery | RI |      |
|-----|------|--------|--------|----|------|
| 1   | 1    | 1      | 1      | 1  | 0,81 |
| 1   | 1    | 1      | 1      | 1  | 0,8  |
| 1   | 1    | 1      | 1      | 1  | 0,9  |
| 1   | 1    | 1      | 2      | 1  | 0,83 |
| 1   | 1    | 1      | 2      | 1  | 0,82 |
| 1   | 1    | 1      | 2      | 1  | 0,82 |
| 1   | 1    | 1      | 1      | 2  | 0,89 |
| 1   | 1    | 1      | 1      | 2  | 0,95 |
| 1   | 1    | 1      | 1      | 2  | 0,96 |
| 1   | 1    | 1      | 2      | 2  | 0,8  |
| 1   | 1    | 1      | 2      | 2  | 0,82 |
| 1   | 1    | 1      | 2      | 2  | 0,81 |
| 1   | 1    | 2      | 1      | 1  | 0,94 |
| 1   | 1    | 2      | 1      | 1  | 0,95 |
| 1   | 1    | 2      | 1      | 1  | 0,96 |
| 1   | 1    | 2      | 2      | 1  | 0,94 |
| 1   | 1    | 2      | 2      | 1  | 0,96 |
| 1   | 1    | 2      | 2      | 1  | 0,94 |
| 1   | 1    | 2      | 1      | 2  | 0,96 |
| 1   | 1    | 2      | 1      | 2  | 0,96 |
| 1   | 1    | 2      | 1      | 2  | 0,96 |
| 1   | 1    | 2      | 2      | 2  | 0,97 |
| 1   | 1    | 2      | 2      | 2  | 0,96 |
| 1   | 1    | 2      | 2      | 2  | 0,97 |
| 1   | 1    | 3      | 1      | 1  | 0,8  |
| 1   | 1    | 3      | 1      | 1  | 0,8  |
| 1   | 1    | 3      | 1      | 1  | 0,8  |
| 1   | 1    | 3      | 2      | 1  | 0,85 |
| 1   | 1    | 3      | 2      | 1  | 0,84 |
| 1   | 1    | 3      | 2      | 1  | 0,83 |
| 1   | 1    | 3      | 1      | 2  | 0,82 |
| 1   | 1    | 3      | 1      | 2  | 0,83 |
| 1   | 1    | 3      | 1      | 2  | 0,84 |
| 1   | 1    | 3      | 2      | 2  | 0,79 |
| 1   | 1    | 3      | 2      | 2  | 0,8  |
| 1   | 1    | 3      | 2      | 2  | 0,82 |
| 1   | 1    | 4      | 1      | 1  | 0,86 |
| 1   | 1    | 4      | 1      | 1  | 0,85 |
| 1   | 1    | 4      | 1      | 1  | 0,87 |
| 1   | 1    | 4      | 2      | 1  | 0,86 |
| 1   | 1    | 4      | 2      | 1  | 0,89 |
| 1   | 1    | 4      | 2      | 1  | 0,87 |
| 1   | 1    | 4      | 1      | 2  | 0,85 |
| 1   | 1    | 4      | 1      | 2  | 0,87 |
| 1   | 1    | 4      | 1      | 2  | 0,89 |
| 1   | 1    | 4      | 2      | 2  | 0,85 |
| 1   | 1    | 4      | 2      | 2  | 0,89 |

|   |   |   |   |      |
|---|---|---|---|------|
| 1 | 4 | 2 | 2 | 0,88 |
| 1 | 5 | 1 | 1 | 0,95 |
| 1 | 5 | 1 | 1 | 0,87 |
| 1 | 5 | 1 | 1 | 0,8  |
| 1 | 5 | 2 | 1 | 0,85 |
| 1 | 5 | 2 | 1 | 0,87 |
| 1 | 5 | 2 | 1 | 0,88 |
| 1 | 5 | 1 | 2 | 0,79 |
| 1 | 5 | 1 | 2 | 0,8  |
| 1 | 5 | 1 | 2 | 0,83 |
| 1 | 5 | 2 | 2 | 0,92 |
| 1 | 5 | 2 | 2 | 0,9  |
| 1 | 5 | 2 | 2 | 0,91 |
| 1 | 6 | 1 | 1 | 0,81 |
| 1 | 6 | 1 | 1 | 0,8  |
| 1 | 6 | 1 | 1 | 0,8  |
| 1 | 6 | 2 | 1 | 0,83 |
| 1 | 6 | 2 | 1 | 0,82 |
| 1 | 6 | 2 | 1 | 0,82 |
| 1 | 6 | 1 | 2 | 0,89 |
| 1 | 6 | 1 | 2 | 0,92 |
| 1 | 6 | 1 | 2 | 0,9  |
| 1 | 6 | 2 | 2 | 0,8  |
| 1 | 6 | 2 | 2 | 0,82 |
| 1 | 6 | 2 | 2 | 0,81 |
| 2 | 1 | 1 | 1 | 0,86 |
| 2 | 1 | 1 | 1 | 0,87 |
| 2 | 1 | 1 | 1 | 0,87 |
| 2 | 1 | 2 | 1 | 0,82 |
| 2 | 1 | 2 | 1 | 0,84 |
| 2 | 1 | 2 | 1 | 0,87 |
| 2 | 1 | 1 | 2 | 0,89 |
| 2 | 1 | 1 | 2 | 0,9  |
| 2 | 1 | 1 | 2 | 0,95 |
| 2 | 1 | 2 | 2 | 0,84 |
| 2 | 1 | 2 | 2 | 0,82 |
| 2 | 1 | 2 | 2 | 0,84 |
| 2 | 2 | 1 | 1 | 0,8  |
| 2 | 2 | 1 | 1 | 0,8  |
| 2 | 2 | 1 | 1 | 0,8  |
| 2 | 2 | 2 | 1 | 0,8  |
| 2 | 2 | 2 | 1 | 0,8  |
| 2 | 2 | 2 | 1 | 0,8  |
| 2 | 2 | 2 | 1 | 0,8  |
| 2 | 2 | 1 | 2 | 0,81 |
| 2 | 2 | 1 | 2 | 0,8  |
| 2 | 2 | 1 | 2 | 0,82 |
| 2 | 2 | 2 | 2 | 0,86 |
| 2 | 2 | 2 | 2 | 0,82 |

|   |   |   |   |      |
|---|---|---|---|------|
| 2 | 2 | 2 | 2 | 0,8  |
| 2 | 3 | 1 | 1 | 0,84 |
| 2 | 3 | 1 | 1 | 0,85 |
| 2 | 3 | 1 | 1 | 0,88 |
| 2 | 3 | 2 | 1 | 0,88 |
| 2 | 3 | 2 | 1 | 0,87 |
| 2 | 3 | 2 | 1 | 0,87 |
| 2 | 3 | 1 | 2 | 0,96 |
| 2 | 3 | 1 | 2 | 0,97 |
| 2 | 3 | 1 | 2 | 0,96 |
| 2 | 3 | 2 | 2 | 0,97 |
| 2 | 3 | 2 | 2 | 0,97 |
| 2 | 3 | 2 | 2 | 0,93 |
| 2 | 4 | 1 | 1 | 0,82 |
| 2 | 4 | 1 | 1 | 0,82 |
| 2 | 4 | 1 | 1 | 0,83 |
| 2 | 4 | 2 | 1 | 0,98 |
| 2 | 4 | 2 | 1 | 0,97 |
| 2 | 4 | 2 | 1 | 0,96 |
| 2 | 4 | 1 | 2 | 0,96 |
| 2 | 4 | 1 | 2 | 0,97 |
| 2 | 4 | 1 | 2 | 0,97 |
| 2 | 4 | 2 | 2 | 0,96 |
| 2 | 4 | 2 | 2 | 0,95 |
| 2 | 4 | 2 | 2 | 0,95 |
| 2 | 5 | 1 | 1 | 0,8  |
| 2 | 5 | 1 | 1 | 0,8  |
| 2 | 5 | 1 | 1 | 0,87 |
| 2 | 5 | 2 | 1 | 0,88 |
| 2 | 5 | 2 | 1 | 0,88 |
| 2 | 5 | 2 | 1 | 0,85 |
| 2 | 5 | 1 | 2 | 0,9  |
| 2 | 5 | 1 | 2 | 0,96 |
| 2 | 5 | 1 | 2 | 0,95 |
| 2 | 5 | 2 | 2 | 0,97 |
| 2 | 5 | 2 | 2 | 0,97 |
| 2 | 5 | 2 | 2 | 0,97 |
| 2 | 6 | 1 | 1 | 0,86 |
| 2 | 6 | 1 | 1 | 0,86 |
| 2 | 6 | 1 | 1 | 0,87 |
| 2 | 6 | 2 | 1 | 0,78 |
| 2 | 6 | 2 | 1 | 0,79 |
| 2 | 6 | 2 | 1 | 0,79 |
| 2 | 6 | 1 | 2 | 0,97 |
| 2 | 6 | 1 | 2 | 0,96 |
| 2 | 6 | 1 | 2 | 0,95 |
| 2 | 6 | 2 | 2 | 0,97 |
| 2 | 6 | 2 | 2 | 0,98 |

|   |   |   |   |      |
|---|---|---|---|------|
| 2 | 6 | 2 | 2 | 0,95 |
| 3 | 1 | 1 | 1 | 0,87 |
| 3 | 1 | 1 | 1 | 0,87 |
| 3 | 1 | 1 | 1 | 0,87 |
| 3 | 1 | 2 | 1 | 0,82 |
| 3 | 1 | 2 | 1 | 0,8  |
| 3 | 1 | 2 | 1 | 0,79 |
| 3 | 1 | 1 | 2 | 0,91 |
| 3 | 1 | 1 | 2 | 0,92 |
| 3 | 1 | 1 | 2 | 0,9  |
| 3 | 1 | 2 | 2 | 0,96 |
| 3 | 1 | 2 | 2 | 0,97 |
| 3 | 1 | 2 | 2 | 0,96 |
| 3 | 2 | 1 | 1 | 0,98 |
| 3 | 2 | 1 | 1 | 0,97 |
| 3 | 2 | 1 | 1 | 0,98 |
| 3 | 2 | 2 | 1 | 0,78 |
| 3 | 2 | 2 | 1 | 0,8  |
| 3 | 2 | 2 | 1 | 0,79 |
| 3 | 2 | 1 | 2 | 0,96 |
| 3 | 2 | 1 | 2 | 0,96 |
| 3 | 2 | 1 | 2 | 0,92 |
| 3 | 2 | 2 | 2 | 0,97 |
| 3 | 2 | 2 | 2 | 0,97 |
| 3 | 2 | 2 | 2 | 0,97 |
| 3 | 3 | 1 | 1 | 0,82 |
| 3 | 3 | 1 | 1 | 0,86 |
| 3 | 3 | 1 | 1 | 0,85 |
| 3 | 3 | 2 | 1 | 0,85 |
| 3 | 3 | 2 | 1 | 0,81 |
| 3 | 3 | 2 | 1 | 0,84 |
| 3 | 3 | 1 | 2 | 0,98 |
| 3 | 3 | 1 | 2 | 0,96 |
| 3 | 3 | 1 | 2 | 0,96 |
| 3 | 3 | 2 | 2 | 0,95 |
| 3 | 3 | 2 | 2 | 0,97 |
| 3 | 3 | 2 | 2 | 0,93 |
| 3 | 4 | 1 | 1 | 0,83 |
| 3 | 4 | 1 | 1 | 0,89 |
| 3 | 4 | 1 | 1 | 0,89 |
| 3 | 4 | 2 | 1 | 0,82 |
| 3 | 4 | 2 | 1 | 0,83 |
| 3 | 4 | 2 | 1 | 0,85 |
| 3 | 4 | 1 | 2 | 0,82 |
| 3 | 4 | 1 | 2 | 0,83 |
| 3 | 4 | 1 | 2 | 0,81 |
| 3 | 4 | 2 | 2 | 0,95 |
| 3 | 4 | 2 | 2 | 0,94 |

|   |   |   |   |      |
|---|---|---|---|------|
| 3 | 4 | 2 | 2 | 0,93 |
| 3 | 5 | 1 | 1 | 0,91 |
| 3 | 5 | 1 | 1 | 0,89 |
| 3 | 5 | 1 | 1 | 0,9  |
| 3 | 5 | 2 | 1 | 0,85 |
| 3 | 5 | 2 | 1 | 0,86 |
| 3 | 5 | 2 | 1 | 0,85 |
| 3 | 5 | 1 | 2 | 0,95 |
| 3 | 5 | 1 | 2 | 0,94 |
| 3 | 5 | 1 | 2 | 0,93 |
| 3 | 5 | 2 | 2 | 0,92 |
| 3 | 5 | 2 | 2 | 0,95 |
| 3 | 5 | 2 | 2 | 0,92 |
| 3 | 6 | 1 | 1 | 0,89 |
| 3 | 6 | 1 | 1 | 0,91 |
| 3 | 6 | 1 | 1 | 0,89 |
| 3 | 6 | 2 | 1 | 0,83 |
| 3 | 6 | 2 | 1 | 0,82 |
| 3 | 6 | 2 | 1 | 0,8  |
| 3 | 6 | 1 | 2 | 0,95 |
| 3 | 6 | 1 | 2 | 0,94 |
| 3 | 6 | 1 | 2 | 0,95 |
| 3 | 6 | 2 | 2 | 0,95 |
| 3 | 6 | 2 | 2 | 0,95 |
| 3 | 6 | 2 | 2 | 0,95 |
| 4 | 1 | 1 | 1 | 0,85 |
| 4 | 1 | 1 | 1 | 0,86 |
| 4 | 1 | 1 | 1 | 0,84 |
| 4 | 1 | 2 | 1 | 0,84 |
| 4 | 1 | 2 | 1 | 0,85 |
| 4 | 1 | 2 | 1 | 0,83 |
| 4 | 1 | 1 | 2 | 0,97 |
| 4 | 1 | 1 | 2 | 0,96 |
| 4 | 1 | 1 | 2 | 0,96 |
| 4 | 1 | 2 | 2 | 0,97 |
| 4 | 1 | 2 | 2 | 0,97 |
| 4 | 1 | 2 | 2 | 0,95 |
| 4 | 2 | 1 | 1 | 0,85 |
| 4 | 2 | 1 | 1 | 0,84 |
| 4 | 2 | 1 | 1 | 0,8  |
| 4 | 2 | 2 | 1 | 0,95 |
| 4 | 2 | 2 | 1 | 0,94 |
| 4 | 2 | 2 | 1 | 0,95 |
| 4 | 2 | 1 | 2 | 0,92 |
| 4 | 2 | 1 | 2 | 0,95 |
| 4 | 2 | 1 | 2 | 0,96 |
| 4 | 2 | 2 | 2 | 0,97 |
| 4 | 2 | 2 | 2 | 0,9  |

|   |   |   |   |      |
|---|---|---|---|------|
| 4 | 2 | 2 | 2 | 0,86 |
| 4 | 3 | 1 | 1 | 0,84 |
| 4 | 3 | 1 | 1 | 0,82 |
| 4 | 3 | 1 | 1 | 0,84 |
| 4 | 3 | 2 | 1 | 0,83 |
| 4 | 3 | 2 | 1 | 0,8  |
| 4 | 3 | 2 | 1 | 0,82 |
| 4 | 3 | 1 | 2 | 0,88 |
| 4 | 3 | 1 | 2 | 0,88 |
| 4 | 3 | 1 | 2 | 0,85 |
| 4 | 3 | 2 | 2 | 0,97 |
| 4 | 3 | 2 | 2 | 0,97 |
| 4 | 3 | 2 | 2 | 0,96 |
| 4 | 4 | 1 | 1 | 0,88 |
| 4 | 4 | 1 | 1 | 0,9  |
| 4 | 4 | 1 | 1 | 0,89 |
| 4 | 4 | 2 | 1 | 0,79 |
| 4 | 4 | 2 | 1 | 0,75 |
| 4 | 4 | 2 | 1 | 0,77 |
| 4 | 4 | 1 | 2 | 0,96 |
| 4 | 4 | 1 | 2 | 0,96 |
| 4 | 4 | 1 | 2 | 0,96 |
| 4 | 4 | 2 | 2 | 0,95 |
| 4 | 4 | 2 | 2 | 0,97 |
| 4 | 4 | 2 | 2 | 0,96 |
| 4 | 5 | 1 | 1 | 0,82 |
| 4 | 5 | 1 | 1 | 0,81 |
| 4 | 5 | 1 | 1 | 0,84 |
| 4 | 5 | 2 | 1 | 0,8  |
| 4 | 5 | 2 | 1 | 0,8  |
| 4 | 5 | 2 | 1 | 0,79 |
| 4 | 5 | 1 | 2 | 0,8  |
| 4 | 5 | 1 | 2 | 0,83 |
| 4 | 5 | 1 | 2 | 0,83 |
| 4 | 5 | 2 | 2 | 0,8  |
| 4 | 5 | 2 | 2 | 0,82 |
| 4 | 5 | 2 | 2 | 0,83 |
| 4 | 6 | 1 | 1 | 0,85 |
| 4 | 6 | 1 | 1 | 0,83 |
| 4 | 6 | 1 | 1 | 0,84 |
| 4 | 6 | 2 | 1 | 0,83 |
| 4 | 6 | 2 | 1 | 0,84 |
| 4 | 6 | 2 | 1 | 0,85 |
| 4 | 6 | 1 | 2 | 0,82 |
| 4 | 6 | 1 | 2 | 0,83 |
| 4 | 6 | 1 | 2 | 0,82 |
| 4 | 6 | 2 | 2 | 0,8  |
| 4 | 6 | 2 | 2 | 0,82 |

|   |   |   |   |      |
|---|---|---|---|------|
| 4 | 6 | 2 | 2 | 0,83 |
| 5 | 1 | 1 | 1 | 0,78 |
| 5 | 1 | 1 | 1 | 0,74 |
| 5 | 1 | 1 | 1 | 0,78 |
| 5 | 1 | 2 | 1 | 0,75 |
| 5 | 1 | 2 | 1 | 0,77 |
| 5 | 1 | 2 | 1 | 0,79 |
| 5 | 1 | 1 | 2 | 0,78 |
| 5 | 1 | 1 | 2 | 0,79 |
| 5 | 1 | 1 | 2 | 0,77 |
| 5 | 1 | 2 | 2 | 0,77 |
| 5 | 1 | 2 | 2 | 0,74 |
| 5 | 1 | 2 | 2 | 0,75 |
| 5 | 2 | 1 | 1 | 0,74 |
| 5 | 2 | 1 | 1 | 0,76 |
| 5 | 2 | 1 | 1 | 0,77 |
| 5 | 2 | 2 | 1 | 0,8  |
| 5 | 2 | 2 | 1 | 0,78 |
| 5 | 2 | 2 | 1 | 0,78 |
| 5 | 2 | 1 | 2 | 0,76 |
| 5 | 2 | 1 | 2 | 0,75 |
| 5 | 2 | 1 | 2 | 0,72 |
| 5 | 2 | 2 | 2 | 0,76 |
| 5 | 2 | 2 | 2 | 0,77 |
| 5 | 2 | 2 | 2 | 0,75 |
| 5 | 3 | 1 | 1 | 0,77 |
| 5 | 3 | 1 | 1 | 0,73 |
| 5 | 3 | 1 | 1 | 0,75 |
| 5 | 3 | 2 | 1 | 0,8  |
| 5 | 3 | 2 | 1 | 0,79 |
| 5 | 3 | 2 | 1 | 0,78 |
| 5 | 3 | 1 | 2 | 0,83 |
| 5 | 3 | 1 | 2 | 0,82 |
| 5 | 3 | 1 | 2 | 0,81 |
| 5 | 3 | 2 | 2 | 0,77 |
| 5 | 3 | 2 | 2 | 0,75 |
| 5 | 3 | 2 | 2 | 0,73 |
| 5 | 4 | 1 | 1 | 0,75 |
| 5 | 4 | 1 | 1 | 0,74 |
| 5 | 4 | 1 | 1 | 0,7  |
| 5 | 4 | 2 | 1 | 0,8  |
| 5 | 4 | 2 | 1 | 0,77 |
| 5 | 4 | 2 | 1 | 0,78 |
| 5 | 4 | 1 | 2 | 0,72 |
| 5 | 4 | 1 | 2 | 0,77 |
| 5 | 4 | 1 | 2 | 0,76 |
| 5 | 4 | 2 | 2 | 0,72 |
| 5 | 4 | 2 | 2 | 0,7  |

|   |   |   |   |      |
|---|---|---|---|------|
| 5 | 4 | 2 | 2 | 0,72 |
| 5 | 5 | 1 | 1 | 0,78 |
| 5 | 5 | 1 | 1 | 0,8  |
| 5 | 5 | 1 | 1 | 0,8  |
| 5 | 5 | 2 | 1 | 0,7  |
| 5 | 5 | 2 | 1 | 0,75 |
| 5 | 5 | 2 | 1 | 0,71 |
| 5 | 5 | 1 | 2 | 0,82 |
| 5 | 5 | 1 | 2 | 0,72 |
| 5 | 5 | 1 | 2 | 0,74 |
| 5 | 5 | 2 | 2 | 0,76 |
| 5 | 5 | 2 | 2 | 0,75 |
| 5 | 5 | 2 | 2 | 0,74 |
| 5 | 6 | 1 | 1 | 0,76 |
| 5 | 6 | 1 | 1 | 0,76 |
| 5 | 6 | 1 | 1 | 0,78 |
| 5 | 6 | 2 | 1 | 0,8  |
| 5 | 6 | 2 | 1 | 0,78 |
| 5 | 6 | 2 | 1 | 0,79 |
| 5 | 6 | 1 | 2 | 0,74 |
| 5 | 6 | 1 | 2 | 0,7  |
| 5 | 6 | 1 | 2 | 0,72 |
| 5 | 6 | 2 | 2 | 0,78 |
| 5 | 6 | 2 | 2 | 0,77 |
| 5 | 6 | 2 | 2 | 0,76 |
| 6 | 1 | 1 | 1 | 0,76 |
| 6 | 1 | 1 | 1 | 0,76 |
| 6 | 1 | 1 | 1 | 0,78 |
| 6 | 1 | 2 | 1 | 0,77 |
| 6 | 1 | 2 | 1 | 0,78 |
| 6 | 1 | 2 | 1 | 0,78 |
| 6 | 1 | 1 | 2 | 0,78 |
| 6 | 1 | 1 | 2 | 0,76 |
| 6 | 1 | 1 | 2 | 0,74 |
| 6 | 1 | 2 | 2 | 0,79 |
| 6 | 1 | 2 | 2 | 0,78 |
| 6 | 1 | 2 | 2 | 0,78 |
| 6 | 2 | 1 | 1 | 0,8  |
| 6 | 2 | 1 | 1 | 0,79 |
| 6 | 2 | 1 | 1 | 0,8  |
| 6 | 2 | 2 | 1 | 0,78 |
| 6 | 2 | 2 | 1 | 0,78 |
| 6 | 2 | 2 | 1 | 0,75 |
| 6 | 2 | 1 | 2 | 0,77 |
| 6 | 2 | 1 | 2 | 0,74 |
| 6 | 2 | 1 | 2 | 0,74 |
| 6 | 2 | 2 | 2 | 0,76 |
| 6 | 2 | 2 | 2 | 0,77 |



|   |   |   |   |       |
|---|---|---|---|-------|
| 6 | 2 | 2 | 2 | 0,78  |
| 6 | 3 | 1 | 1 | 0,78  |
| 6 | 3 | 1 | 1 | 0,74  |
| 6 | 3 | 1 | 1 | 0,78  |
| 6 | 3 | 2 | 1 | 0,79  |
| 6 | 3 | 2 | 1 | 0,77  |
| 6 | 3 | 2 | 1 | 0,74  |
| 6 | 3 | 1 | 2 | 0,79  |
| 6 | 3 | 1 | 2 | 0,77  |
| 6 | 3 | 1 | 2 | 0,75  |
| 6 | 3 | 2 | 2 | 0,71  |
| 6 | 3 | 2 | 2 | 0,7   |
| 6 | 3 | 2 | 2 | 0,7   |
| 6 | 4 | 1 | 1 | 0,67  |
| 6 | 4 | 1 | 1 | 0,67  |
| 6 | 4 | 1 | 1 | 0,68  |
| 6 | 4 | 2 | 1 | 0,71  |
| 6 | 4 | 2 | 1 | 0,73  |
| 6 | 4 | 2 | 1 | 0,72  |
| 6 | 4 | 1 | 2 | 0,7   |
| 6 | 4 | 1 | 2 | 0,69  |
| 6 | 4 | 1 | 2 | 0,7   |
| 6 | 4 | 2 | 2 | 0,74  |
| 6 | 4 | 2 | 2 | 0,76  |
| 6 | 4 | 2 | 2 | 0,75  |
| 6 | 5 | 1 | 1 | 0,7   |
| 6 | 5 | 1 | 1 | 0,74  |
| 6 | 5 | 1 | 1 | 0,74  |
| 6 | 5 | 2 | 1 | 0,75  |
| 6 | 5 | 2 | 1 | 0,75  |
| 6 | 5 | 2 | 1 | 0,73  |
| 6 | 5 | 1 | 2 | 0,65  |
| 6 | 5 | 1 | 2 | 0,67  |
| 6 | 5 | 1 | 2 | 0,66  |
| 6 | 5 | 2 | 2 | 0,74  |
| 6 | 5 | 2 | 2 | 0,74  |
| 6 | 5 | 2 | 2 | 0,74  |
| 6 | 6 | 1 | 1 | 0,65  |
| 6 | 6 | 1 | 1 | 0,67  |
| 6 | 6 | 1 | 1 | 0,69  |
| 6 | 6 | 2 | 1 | 0,68  |
| 6 | 6 | 2 | 1 | 0,72  |
| 6 | 6 | 2 | 1 | 0,67  |
| 6 | 6 | 1 | 2 | 0,667 |
| 6 | 6 | 1 | 2 | 0,68  |
| 6 | 6 | 1 | 2 | 0,69  |
| 6 | 6 | 2 | 2 | 0,67  |
| 6 | 6 | 2 | 2 | 0,7   |

|   |   |   |   |      |
|---|---|---|---|------|
| 6 | 6 | 2 | 2 | 0,68 |
| 7 | 1 | 1 | 1 | 0,67 |
| 7 | 1 | 1 | 1 | 0,7  |
| 7 | 1 | 1 | 1 | 0,7  |
| 7 | 1 | 2 | 1 | 0,75 |
| 7 | 1 | 2 | 1 | 0,75 |
| 7 | 1 | 2 | 1 | 0,73 |
| 7 | 1 | 1 | 2 | 0,61 |
| 7 | 1 | 1 | 2 | 0,68 |
| 7 | 1 | 1 | 2 | 0,67 |
| 7 | 1 | 2 | 2 | 0,72 |
| 7 | 1 | 2 | 2 | 0,72 |
| 7 | 1 | 2 | 2 | 0,7  |
| 7 | 2 | 1 | 1 | 0,75 |
| 7 | 2 | 1 | 1 | 0,73 |
| 7 | 2 | 1 | 1 | 0,74 |
| 7 | 2 | 2 | 1 | 0,78 |
| 7 | 2 | 2 | 1 | 0,78 |
| 7 | 2 | 2 | 1 | 0,76 |
| 7 | 2 | 1 | 2 | 0,7  |
| 7 | 2 | 1 | 2 | 0,73 |
| 7 | 2 | 1 | 2 | 0,73 |
| 7 | 2 | 2 | 2 | 0,75 |
| 7 | 2 | 2 | 2 | 0,75 |
| 7 | 2 | 2 | 2 | 0,75 |
| 7 | 3 | 1 | 1 | 0,65 |
| 7 | 3 | 1 | 1 | 0,65 |
| 7 | 3 | 1 | 1 | 0,66 |
| 7 | 3 | 2 | 1 | 0,74 |
| 7 | 3 | 2 | 1 | 0,75 |
| 7 | 3 | 2 | 1 | 0,75 |
| 7 | 3 | 1 | 2 | 0,63 |
| 7 | 3 | 1 | 2 | 0,65 |
| 7 | 3 | 1 | 2 | 0,66 |
| 7 | 3 | 2 | 2 | 0,75 |
| 7 | 3 | 2 | 2 | 0,75 |
| 7 | 3 | 2 | 2 | 0,71 |
| 7 | 4 | 1 | 1 | 0,71 |
| 7 | 4 | 1 | 1 | 0,7  |
| 7 | 4 | 1 | 1 | 0,73 |
| 7 | 4 | 2 | 1 | 0,74 |
| 7 | 4 | 2 | 1 | 0,75 |
| 7 | 4 | 2 | 1 | 0,75 |
| 7 | 4 | 1 | 2 | 0,73 |
| 7 | 4 | 1 | 2 | 0,73 |
| 7 | 4 | 1 | 2 | 0,72 |
| 7 | 4 | 2 | 2 | 0,69 |
| 7 | 4 | 2 | 2 | 0,69 |

|   |   |   |   |      |
|---|---|---|---|------|
| 7 | 4 | 2 | 2 | 0,69 |
| 7 | 5 | 1 | 1 | 0,73 |
| 7 | 5 | 1 | 1 | 0,77 |
| 7 | 5 | 1 | 1 | 0,75 |
| 7 | 5 | 2 | 1 | 0,72 |
| 7 | 5 | 2 | 1 | 0,74 |
| 7 | 5 | 2 | 1 | 0,73 |
| 7 | 5 | 1 | 2 | 0,6  |
| 7 | 5 | 1 | 2 | 0,61 |
| 7 | 5 | 1 | 2 | 0,6  |
| 7 | 5 | 2 | 2 | 0,76 |
| 7 | 5 | 2 | 2 | 0,74 |
| 7 | 5 | 2 | 2 | 0,74 |
| 7 | 6 | 1 | 1 | 0,66 |
| 7 | 6 | 1 | 1 | 0,64 |
| 7 | 6 | 1 | 1 | 0,65 |
| 7 | 6 | 2 | 1 | 0,74 |
| 7 | 6 | 2 | 1 | 0,77 |
| 7 | 6 | 2 | 1 | 0,75 |
| 7 | 6 | 1 | 2 | 0,66 |
| 7 | 6 | 1 | 2 | 0,62 |
| 7 | 6 | 1 | 2 | 0,65 |
| 7 | 6 | 2 | 2 | 0,62 |
| 7 | 6 | 2 | 2 | 0,68 |
| 7 | 6 | 2 | 2 | 0,66 |
| 8 | 1 | 1 | 1 | 0,55 |
| 8 | 1 | 1 | 1 | 0,54 |
| 8 | 1 | 1 | 1 | 0,55 |
| 8 | 1 | 2 | 1 | 0,59 |
| 8 | 1 | 2 | 1 | 0,54 |
| 8 | 1 | 2 | 1 | 0,57 |
| 8 | 1 | 1 | 2 | 0,55 |
| 8 | 1 | 1 | 2 | 0,55 |
| 8 | 1 | 1 | 2 | 0,59 |
| 8 | 1 | 2 | 2 | 0,66 |
| 8 | 1 | 2 | 2 | 0,67 |
| 8 | 1 | 2 | 2 | 0,6  |
| 8 | 2 | 1 | 1 | 0,68 |
| 8 | 2 | 1 | 1 | 0,67 |
| 8 | 2 | 1 | 1 | 0,68 |
| 8 | 2 | 2 | 1 | 0,65 |
| 8 | 2 | 2 | 1 | 0,68 |
| 8 | 2 | 2 | 1 | 0,7  |
| 8 | 2 | 1 | 2 | 0,63 |
| 8 | 2 | 1 | 2 | 0,63 |
| 8 | 2 | 1 | 2 | 0,63 |
| 8 | 2 | 2 | 2 | 0,58 |
| 8 | 2 | 2 | 2 | 0,59 |

|   |   |   |   |      |
|---|---|---|---|------|
| 8 | 2 | 2 | 2 | 0,57 |
| 8 | 3 | 1 | 1 | 0,59 |
| 8 | 3 | 1 | 1 | 0,55 |
| 8 | 3 | 1 | 1 | 0,57 |
| 8 | 3 | 2 | 1 | 0,67 |
| 8 | 3 | 2 | 1 | 0,64 |
| 8 | 3 | 2 | 1 | 0,67 |
| 8 | 3 | 1 | 2 | 0,64 |
| 8 | 3 | 1 | 2 | 0,63 |
| 8 | 3 | 1 | 2 | 0,61 |
| 8 | 3 | 2 | 2 | 0,64 |
| 8 | 3 | 2 | 2 | 0,65 |
| 8 | 3 | 2 | 2 | 0,59 |
| 8 | 4 | 1 | 1 | 0,7  |
| 8 | 4 | 1 | 1 | 0,73 |
| 8 | 4 | 1 | 1 | 0,74 |
| 8 | 4 | 2 | 1 | 0,69 |
| 8 | 4 | 2 | 1 | 0,67 |
| 8 | 4 | 2 | 1 | 0,68 |
| 8 | 4 | 1 | 2 | 0,74 |
| 8 | 4 | 1 | 2 | 0,73 |
| 8 | 4 | 1 | 2 | 0,7  |
| 8 | 4 | 2 | 2 | 0,65 |
| 8 | 4 | 2 | 2 | 0,64 |
| 8 | 4 | 2 | 2 | 0,7  |
| 8 | 5 | 1 | 1 | 0,73 |
| 8 | 5 | 1 | 1 | 0,74 |
| 8 | 5 | 1 | 1 | 0,73 |
| 8 | 5 | 2 | 1 | 0,73 |
| 8 | 5 | 2 | 1 | 0,73 |
| 8 | 5 | 2 | 1 | 0,74 |
| 8 | 5 | 1 | 2 | 0,74 |
| 8 | 5 | 1 | 2 | 0,75 |
| 8 | 5 | 1 | 2 | 0,73 |
| 8 | 5 | 2 | 2 | 0,72 |
| 8 | 5 | 2 | 2 | 0,73 |
| 8 | 5 | 2 | 2 | 0,72 |
| 8 | 6 | 1 | 1 | 0,68 |
| 8 | 6 | 1 | 1 | 0,68 |
| 8 | 6 | 1 | 1 | 0,63 |
| 8 | 6 | 2 | 1 | 0,7  |
| 8 | 6 | 2 | 1 | 0,69 |
| 8 | 6 | 2 | 1 | 0,69 |
| 8 | 6 | 1 | 2 | 0,63 |
| 8 | 6 | 1 | 2 | 0,66 |
| 8 | 6 | 1 | 2 | 0,66 |
| 8 | 6 | 2 | 2 | 0,61 |
| 8 | 6 | 2 | 2 | 0,62 |

|   |   |   |   |      |
|---|---|---|---|------|
| 8 | 6 | 2 | 2 | 0,62 |
| 9 | 1 | 1 | 1 | 0,57 |
| 9 | 1 | 1 | 1 | 0,57 |
| 9 | 1 | 1 | 1 | 0,58 |
| 9 | 1 | 2 | 1 | 0,68 |
| 9 | 1 | 2 | 1 | 0,62 |
| 9 | 1 | 2 | 1 | 0,66 |
| 9 | 1 | 1 | 2 | 0,7  |
| 9 | 1 | 1 | 2 | 0,7  |
| 9 | 1 | 1 | 2 | 0,7  |
| 9 | 1 | 2 | 2 | 0,57 |
| 9 | 1 | 2 | 2 | 0,57 |
| 9 | 1 | 2 | 2 | 0,57 |
| 9 | 2 | 1 | 1 | 0,57 |
| 9 | 2 | 1 | 1 | 0,62 |
| 9 | 2 | 1 | 1 | 0,6  |
| 9 | 2 | 2 | 1 | 0,69 |
| 9 | 2 | 2 | 1 | 0,64 |
| 9 | 2 | 2 | 1 | 0,64 |
| 9 | 2 | 1 | 2 | 0,62 |
| 9 | 2 | 1 | 2 | 0,65 |
| 9 | 2 | 1 | 2 | 0,65 |
| 9 | 2 | 2 | 2 | 0,68 |
| 9 | 2 | 2 | 2 | 0,66 |
| 9 | 2 | 2 | 2 | 0,63 |
| 9 | 3 | 1 | 1 | 0,64 |
| 9 | 3 | 1 | 1 | 0,61 |
| 9 | 3 | 1 | 1 | 0,63 |
| 9 | 3 | 2 | 1 | 0,74 |
| 9 | 3 | 2 | 1 | 0,74 |
| 9 | 3 | 2 | 1 | 0,72 |
| 9 | 3 | 1 | 2 | 0,62 |
| 9 | 3 | 1 | 2 | 0,6  |
| 9 | 3 | 1 | 2 | 0,6  |
| 9 | 3 | 2 | 2 | 0,6  |
| 9 | 3 | 2 | 2 | 0,64 |
| 9 | 3 | 2 | 2 | 0,62 |
| 9 | 4 | 1 | 1 | 0,69 |
| 9 | 4 | 1 | 1 | 0,61 |
| 9 | 4 | 1 | 1 | 0,64 |
| 9 | 4 | 2 | 1 | 0,67 |
| 9 | 4 | 2 | 1 | 0,69 |
| 9 | 4 | 2 | 1 | 0,64 |
| 9 | 4 | 1 | 2 | 0,6  |
| 9 | 4 | 1 | 2 | 0,68 |
| 9 | 4 | 1 | 2 | 0,65 |
| 9 | 4 | 2 | 2 | 0,66 |
| 9 | 4 | 2 | 2 | 0,66 |

|    |   |   |   |      |
|----|---|---|---|------|
| 9  | 4 | 2 | 2 | 0,7  |
| 9  | 5 | 1 | 1 | 0,58 |
| 9  | 5 | 1 | 1 | 0,57 |
| 9  | 5 | 1 | 1 | 0,55 |
| 9  | 5 | 2 | 1 | 0,66 |
| 9  | 5 | 2 | 1 | 0,65 |
| 9  | 5 | 2 | 1 | 0,65 |
| 9  | 5 | 1 | 2 | 0,65 |
| 9  | 5 | 1 | 2 | 0,61 |
| 9  | 5 | 1 | 2 | 0,64 |
| 9  | 5 | 2 | 2 | 0,62 |
| 9  | 5 | 2 | 2 | 0,62 |
| 9  | 5 | 2 | 2 | 0,65 |
| 9  | 6 | 1 | 1 | 0,55 |
| 9  | 6 | 1 | 1 | 0,57 |
| 9  | 6 | 1 | 1 | 0,59 |
| 9  | 6 | 2 | 1 | 0,57 |
| 9  | 6 | 2 | 1 | 0,55 |
| 9  | 6 | 2 | 1 | 0,57 |
| 9  | 6 | 1 | 2 | 0,54 |
| 9  | 6 | 1 | 2 | 0,58 |
| 9  | 6 | 1 | 2 | 0,57 |
| 9  | 6 | 2 | 2 | 0,61 |
| 9  | 6 | 2 | 2 | 0,59 |
| 9  | 6 | 2 | 2 | 0,62 |
| 10 | 1 | 1 | 1 | 0,6  |
| 10 | 1 | 1 | 1 | 0,61 |
| 10 | 1 | 1 | 1 | 0,6  |
| 10 | 1 | 2 | 1 | 0,68 |
| 10 | 1 | 2 | 1 | 0,6  |
| 10 | 1 | 2 | 1 | 0,6  |
| 10 | 1 | 1 | 2 | 0,67 |
| 10 | 1 | 1 | 2 | 0,69 |
| 10 | 1 | 1 | 2 | 0,67 |
| 10 | 1 | 2 | 2 | 0,62 |
| 10 | 1 | 2 | 2 | 0,6  |
| 10 | 1 | 2 | 2 | 0,6  |
| 10 | 2 | 1 | 1 | 0,67 |
| 10 | 2 | 1 | 1 | 0,69 |
| 10 | 2 | 1 | 1 | 0,7  |
| 10 | 2 | 2 | 1 | 0,57 |
| 10 | 2 | 2 | 1 | 0,58 |
| 10 | 2 | 2 | 1 | 0,6  |
| 10 | 2 | 1 | 2 | 0,65 |
| 10 | 2 | 1 | 2 | 0,65 |
| 10 | 2 | 1 | 2 | 0,67 |
| 10 | 2 | 2 | 2 | 0,7  |
| 10 | 2 | 2 | 2 | 0,67 |

|    |   |   |   |      |
|----|---|---|---|------|
| 10 | 2 | 2 | 2 | 0,68 |
| 10 | 3 | 1 | 1 | 0,6  |
| 10 | 3 | 1 | 1 | 0,63 |
| 10 | 3 | 1 | 1 | 0,6  |
| 10 | 3 | 2 | 1 | 0,63 |
| 10 | 3 | 2 | 1 | 0,61 |
| 10 | 3 | 2 | 1 | 0,68 |
| 10 | 3 | 1 | 2 | 0,65 |
| 10 | 3 | 1 | 2 | 0,68 |
| 10 | 3 | 1 | 2 | 0,65 |
| 10 | 3 | 2 | 2 | 0,61 |
| 10 | 3 | 2 | 2 | 0,6  |
| 10 | 3 | 2 | 2 | 0,65 |
| 10 | 4 | 1 | 1 | 0,56 |
| 10 | 4 | 1 | 1 | 0,56 |
| 10 | 4 | 1 | 1 | 0,56 |
| 10 | 4 | 2 | 1 | 0,69 |
| 10 | 4 | 2 | 1 | 0,64 |
| 10 | 4 | 2 | 1 | 0,67 |
| 10 | 4 | 1 | 2 | 0,59 |
| 10 | 4 | 1 | 2 | 0,58 |
| 10 | 4 | 1 | 2 | 0,6  |
| 10 | 4 | 2 | 2 | 0,6  |
| 10 | 4 | 2 | 2 | 0,6  |
| 10 | 4 | 2 | 2 | 0,6  |
| 10 | 5 | 1 | 1 | 0,6  |
| 10 | 5 | 1 | 1 | 0,59 |
| 10 | 5 | 1 | 1 | 0,6  |
| 10 | 5 | 2 | 1 | 0,76 |
| 10 | 5 | 2 | 1 | 0,77 |
| 10 | 5 | 2 | 1 | 0,78 |
| 10 | 5 | 1 | 2 | 0,71 |
| 10 | 5 | 1 | 2 | 0,71 |
| 10 | 5 | 1 | 2 | 0,75 |
| 10 | 5 | 2 | 2 | 0,57 |
| 10 | 5 | 2 | 2 | 0,57 |
| 10 | 5 | 2 | 2 | 0,61 |
| 10 | 6 | 1 | 1 | 0,6  |
| 10 | 6 | 1 | 1 | 0,61 |
| 10 | 6 | 1 | 1 | 0,6  |
| 10 | 6 | 2 | 1 | 0,6  |
| 10 | 6 | 2 | 1 | 0,6  |
| 10 | 6 | 2 | 1 | 0,7  |
| 10 | 6 | 1 | 2 | 0,69 |
| 10 | 6 | 1 | 2 | 0,69 |
| 10 | 6 | 1 | 2 | 0,69 |
| 10 | 6 | 2 | 2 | 0,7  |
| 10 | 6 | 2 | 2 | 0,7  |

|    |   |   |   |      |
|----|---|---|---|------|
| 10 | 6 | 2 | 2 | 0,7  |
| 11 | 1 | 1 | 1 | 0,56 |
| 11 | 1 | 1 | 1 | 0,58 |
| 11 | 1 | 1 | 1 | 0,56 |
| 11 | 1 | 2 | 1 | 0,57 |
| 11 | 1 | 2 | 1 | 0,57 |
| 11 | 1 | 2 | 1 | 0,6  |
| 11 | 1 | 1 | 2 | 0,6  |
| 11 | 1 | 1 | 2 | 0,62 |
| 11 | 1 | 1 | 2 | 0,65 |
| 11 | 1 | 2 | 2 | 0,63 |
| 11 | 1 | 2 | 2 | 0,61 |
| 11 | 1 | 2 | 2 | 0,63 |
| 11 | 2 | 1 | 1 | 0,57 |
| 11 | 2 | 1 | 1 | 0,57 |
| 11 | 2 | 1 | 1 | 0,57 |
| 11 | 2 | 2 | 1 | 0,57 |
| 11 | 2 | 2 | 1 | 0,62 |
| 11 | 2 | 2 | 1 | 0,6  |
| 11 | 2 | 1 | 2 | 0,6  |
| 11 | 2 | 1 | 2 | 0,6  |
| 11 | 2 | 1 | 2 | 0,63 |
| 11 | 2 | 2 | 2 | 0,59 |
| 11 | 2 | 2 | 2 | 0,57 |
| 11 | 2 | 2 | 2 | 0,57 |
| 11 | 3 | 1 | 1 | 0,56 |
| 11 | 3 | 1 | 1 | 0,58 |
| 11 | 3 | 1 | 1 | 0,57 |
| 11 | 3 | 2 | 1 | 0,56 |
| 11 | 3 | 2 | 1 | 0,55 |
| 11 | 3 | 2 | 1 | 0,6  |
| 11 | 3 | 1 | 2 | 0,61 |
| 11 | 3 | 1 | 2 | 0,63 |
| 11 | 3 | 1 | 2 | 0,6  |
| 11 | 3 | 2 | 2 | 0,6  |
| 11 | 3 | 2 | 2 | 0,64 |
| 11 | 3 | 2 | 2 | 0,6  |
| 11 | 4 | 1 | 1 | 0,73 |
| 11 | 4 | 1 | 1 | 0,72 |
| 11 | 4 | 1 | 1 | 0,69 |
| 11 | 4 | 2 | 1 | 0,63 |
| 11 | 4 | 2 | 1 | 0,6  |
| 11 | 4 | 2 | 1 | 0,62 |
| 11 | 4 | 1 | 2 | 0,66 |
| 11 | 4 | 1 | 2 | 0,68 |
| 11 | 4 | 1 | 2 | 0,69 |
| 11 | 4 | 2 | 2 | 0,68 |
| 11 | 4 | 2 | 2 | 0,67 |



|    |   |   |   |      |
|----|---|---|---|------|
| 11 | 4 | 2 | 2 | 0,65 |
| 11 | 5 | 1 | 1 | 0,6  |
| 11 | 5 | 1 | 1 | 0,59 |
| 11 | 5 | 1 | 1 | 0,61 |
| 11 | 5 | 2 | 1 | 0,62 |
| 11 | 5 | 2 | 1 | 0,66 |
| 11 | 5 | 2 | 1 | 0,64 |
| 11 | 5 | 1 | 2 | 0,6  |
| 11 | 5 | 1 | 2 | 0,65 |
| 11 | 5 | 1 | 2 | 0,64 |
| 11 | 5 | 2 | 2 | 0,6  |
| 11 | 5 | 2 | 2 | 0,6  |
| 11 | 5 | 2 | 2 | 0,6  |
| 11 | 6 | 1 | 1 | 0,67 |
| 11 | 6 | 1 | 1 | 0,68 |
| 11 | 6 | 1 | 1 | 0,67 |
| 11 | 6 | 2 | 1 | 0,64 |
| 11 | 6 | 2 | 1 | 0,66 |
| 11 | 6 | 2 | 1 | 0,62 |
| 11 | 6 | 1 | 2 | 0,62 |
| 11 | 6 | 1 | 2 | 0,66 |
| 11 | 6 | 1 | 2 | 0,64 |
| 11 | 6 | 2 | 2 | 0,7  |
| 11 | 6 | 2 | 2 | 0,65 |
| 11 | 6 | 2 | 2 | 0,7  |
| 12 | 1 | 1 | 1 | 0,66 |
| 12 | 1 | 1 | 1 | 0,64 |
| 12 | 1 | 1 | 1 | 0,62 |
| 12 | 1 | 2 | 1 | 0,67 |
| 12 | 1 | 2 | 1 | 0,7  |
| 12 | 1 | 2 | 1 | 0,67 |
| 12 | 1 | 1 | 2 | 0,65 |
| 12 | 1 | 1 | 2 | 0,62 |
| 12 | 1 | 1 | 2 | 0,6  |
| 12 | 1 | 2 | 2 | 0,63 |
| 12 | 1 | 2 | 2 | 0,64 |
| 12 | 1 | 2 | 2 | 0,63 |
| 12 | 2 | 1 | 1 | 0,65 |
| 12 | 2 | 1 | 1 | 0,67 |
| 12 | 2 | 1 | 1 | 0,65 |
| 12 | 2 | 2 | 1 | 0,66 |
| 12 | 2 | 2 | 1 | 0,67 |
| 12 | 2 | 2 | 1 | 0,68 |
| 12 | 2 | 1 | 2 | 0,63 |
| 12 | 2 | 1 | 2 | 0,62 |
| 12 | 2 | 1 | 2 | 0,65 |
| 12 | 2 | 2 | 2 | 0,67 |
| 12 | 2 | 2 | 2 | 0,65 |

|    |   |   |   |      |
|----|---|---|---|------|
| 12 | 2 | 2 | 2 | 0,67 |
| 12 | 3 | 1 | 1 | 0,7  |
| 12 | 3 | 1 | 1 | 0,66 |
| 12 | 3 | 1 | 1 | 0,67 |
| 12 | 3 | 2 | 1 | 0,65 |
| 12 | 3 | 2 | 1 | 0,65 |
| 12 | 3 | 2 | 1 | 0,63 |
| 12 | 3 | 1 | 2 | 0,63 |
| 12 | 3 | 1 | 2 | 0,61 |
| 12 | 3 | 1 | 2 | 0,65 |
| 12 | 3 | 2 | 2 | 0,63 |
| 12 | 3 | 2 | 2 | 0,63 |
| 12 | 3 | 2 | 2 | 0,64 |
| 12 | 4 | 1 | 1 | 0,65 |
| 12 | 4 | 1 | 1 | 0,66 |
| 12 | 4 | 1 | 1 | 0,65 |
| 12 | 4 | 2 | 1 | 0,66 |
| 12 | 4 | 2 | 1 | 0,67 |
| 12 | 4 | 2 | 1 | 0,68 |
| 12 | 4 | 1 | 2 | 0,64 |
| 12 | 4 | 1 | 2 | 0,62 |
| 12 | 4 | 1 | 2 | 0,65 |
| 12 | 4 | 2 | 2 | 0,67 |
| 12 | 4 | 2 | 2 | 0,65 |
| 12 | 4 | 2 | 2 | 0,67 |
| 12 | 5 | 1 | 1 | 0,66 |
| 12 | 5 | 1 | 1 | 0,65 |
| 12 | 5 | 1 | 1 | 0,65 |
| 12 | 5 | 2 | 1 | 0,65 |
| 12 | 5 | 2 | 1 | 0,65 |
| 12 | 5 | 2 | 1 | 0,63 |
| 12 | 5 | 1 | 2 | 0,63 |
| 12 | 5 | 1 | 2 | 0,62 |
| 12 | 5 | 1 | 2 | 0,65 |
| 12 | 5 | 2 | 2 | 0,64 |
| 12 | 5 | 2 | 2 | 0,63 |
| 12 | 5 | 2 | 2 | 0,64 |
| 12 | 6 | 1 | 1 | 0,64 |
| 12 | 6 | 1 | 1 | 0,67 |
| 12 | 6 | 1 | 1 | 0,67 |
| 12 | 6 | 2 | 1 | 0,67 |
| 12 | 6 | 2 | 1 | 0,64 |
| 12 | 6 | 2 | 1 | 0,7  |
| 12 | 6 | 1 | 2 | 0,73 |
| 12 | 6 | 1 | 2 | 0,7  |
| 12 | 6 | 1 | 2 | 0,7  |
| 12 | 6 | 2 | 2 | 0,7  |
| 12 | 6 | 2 | 2 | 0,73 |

12

6

2

2

0,73
